1  
2  
3  
4  
5  
6  
7  
8  
9  
10  
11  
12  
13  
14  
15  
16  
17  
18  
19  
20  
21  
22  
23  
24

Application of Omni-ATAC to Profile Chromatin Accessibility Before  
and After Ovarian Tissue Cryopreservation

Jennifer A. Shannon, MD<sup>1,2,3</sup>, Aishwarya Sundaresan, MS<sup>2,3</sup>, Orhan Bukulmez, MD<sup>1</sup>, Zexu Jiao, MD/PhD<sup>1</sup>,  
Sarah Capelouto, MD<sup>1</sup>, Bruce Carr, MD<sup>1,2</sup>, Laura A. Banaszynski, PhD<sup>2,4,5</sup>

<sup>1</sup>Department of Obstetrics and Gynecology: Division of Reproductive Endocrinology and Infertility, UT  
Southwestern Medical Center, Dallas, TX 75390, USA

<sup>2</sup>Cecil H. and Ida Green Center for Reproductive Biology Sciences, UT Southwestern Medical Center,  
Dallas, TX 75390, USA

<sup>3</sup>These authors contributed equally to this study.

<sup>4</sup>This work was funded by NIGMS R35124958 (L.B.), the Department of Obstetrics and Gynecology, and  
the Green Center for Reproductive Biology Sciences.

<sup>5</sup>Correspondence: Laura Banaszynski, PhD, 5323 Harry Hines Blvd, Dallas, TX 75390-8511, USA, email:  
[laura.banaszynski@utsouthwestern.edu](mailto:laura.banaszynski@utsouthwestern.edu)

<sup>6</sup>GEO GSE165637

Running title. Cryopreservation dysregulates follicle enhancers.

Summary sentence. Cryopreservation of ovarian cortical tissue results in activation of differentiation and  
EMT pathways in follicles, which may explain graft burnout after autotransplantation.

Keywords. Ovarian Tissue Cryopreservation, follicles, enhancers, ATAC-seq, EMT

25 **Abstract**

26 Ovarian tissue cryopreservation and subsequent autologous transplantation has allowed resumption of  
27 endocrine function as well as fertility in certain populations. However, graft function is short-lived due  
28 to ischemia and aberrant follicular activation post-transplantation. While many studies have focused on  
29 gene expression, we wanted to determine whether cryopreservation itself had a deleterious effect on  
30 regulatory elements that might influence transcriptional integrity and graft performance. In this study,  
31 we used Omni-ATAC to assess genome-wide chromatin accessibility in primary human follicles before  
32 and after cryopreservation. Omni-ATAC from fresh ovarian follicles identified active regulatory elements  
33 expected to be functional in oocytes and granulosa cells, and gene ontology was consistent with RNA  
34 translation/processing and DNA repair. While promoter accessibility was largely maintained in  
35 cryopreserved ovarian follicles, we observed a widespread increase in the number of accessible  
36 enhancers. Transcription factor motif analysis and gene ontology suggested that this dysregulation was  
37 focused around the epithelial-mesenchymal transition. Indeed, transcription factor binding was noted in  
38 major pathways involved in this transition: TGF- $\beta$  and Wnt signaling. Overall, our work provides the first  
39 genomic analysis of active regulatory elements in matched fresh and cryopreserved ovarian follicles as  
40 they undergo the process of ovarian tissue cryopreservation. Our data suggest that the process of  
41 cryopreservation activates an epithelial-mesenchymal transition state, which may lead to graft burn-out  
42 post-transplantation. Optimizing this technique in relation to this transition may therefore be an  
43 important step towards improving graft longevity and patient outcomes in fertility preservation.

44 **Introduction**

45 Ovarian tissue cryopreservation with subsequent autologous transplantation is a promising technique  
46 that has allowed resumption of endocrine function as well as fertility in certain populations. Most  
47 successfully, the technique has been applied to patients facing gonadotoxic therapy as well as a subset  
48 of patients with premature ovarian insufficiency [1–5]. It is the only option for fertility preservation in  
49 pre-pubertal patients needing gonadotoxic therapy. Autologous transplant of cryopreserved ovarian  
50 tissue is responsible for around 200 births worldwide [6], with the first birth from cryopreserved pre-  
51 pubertal tissue occurring in 2015 [7]. Outcomes are promising, with endocrine function lasting on  
52 average 5 years [4,5,8,9], and live birth rates of up to 41% [5].

53  
54 The technique of ovarian tissue cryopreservation with subsequent autologous transplantation is multi-  
55 faceted, and continued efforts focus on optimization. These efforts aim to address the best method to  
56 process the tissue, to preserve graft longevity, and to maximize graft fertility potential. Much research  
57 has occurred on a clinical scale, for example, method of cryopreservation, method of transplantation,  
58 and graft management post-transplantation [10–13]. Other research to optimize this technique has  
59 focused on the molecular mechanisms behind limited graft longevity. Longevity is dependent on  
60 functional ovarian follicles [14,15], and the majority of follicles are lost within the first few days of  
61 transplant [16,17]. Ischemia and uncontrolled follicular activation are the main causes behind this loss  
62 [16,18–20]. To address this, some have applied techniques used in skin grafting to expedite the process  
63 of neovascularization [21]. Others have focused on additive factors, like VEGF-A, vitamin E, or  
64 hyaluronan [22], or bFGF [23]. Yet another group utilized known pathways involved in follicular  
65 activation to increase follicular activation, with reported live births [2].

66  
67 Our study aims to add another layer to the current understanding of the molecular pathways affected by  
68 this technique. Our goal is to apply a new method, omni-ATAC, to profile chromatin accessibility in  
69 ovarian follicles during the process of ovarian tissue cryopreservation, and to determine if  
70 cryopreservation itself has a deleterious effect on regulatory element chromatin structure and  
71 transcriptional integrity that might influence graft performance.

## 72 **Materials & Methods**

### 73 Ovarian Tissue Procurement and Processing

74 The Institutional Review Board of UT Southwestern Medical Center approved the use of human tissue.  
75 Written informed consent was obtained from women undergoing oophorectomy while receiving surgery  
76 for benign gynecologic indications, such as abnormal uterine bleeding or pelvic pain. Six women  
77 participated and ranged in age from 35 to 45 years old. On average, about three 1 cm ovarian slices  
78 were obtained per sample. Samples were placed in HTF media (Cooper Surgical) and transported from  
79 the operating room on ice to the laboratory for processing. Ovarian slices were sharply dissected into  
80 cortical pieces, ranging from 5-10 x 10 x 1 mm in dimension. Two pieces were submitted for  
81 histopathologic evaluation, and two pieces were used for immediate tissue digestion and follicular  
82 isolation. The remaining pieces were vitrified, and subsequently warmed, according to the previously  
83 published protocol by Silber et al. 2017 [24] with some modifications.

84

### 85 Ovarian Tissue Digestion and Follicle Isolation

86 Digestion of ovarian cortical pieces and isolation of ovarian follicles followed previously published  
87 protocols [25,26]. For fresh isolation, the cortical pieces were sharply dissected into smaller pieces of  
88 about 2x2x2mm in size. These were added to a 50mL conical tube with 10mL Dulbecco's phosphate-  
89 buffered saline (PBS, UTSW General Store) and 0.28 Wunsch units/mL Liberase DH (Sigma-Aldrich). The  
90 conical tube was sealed with parafilm and placed in a water bath at 37°C with gentle agitation. The  
91 digestion was terminated after 75 minutes by adding 10mL of 10% fetal bovine serum in Dulbecco's PBS  
92 at 4°C. The supernatant was removed, and the tissue was placed on a petri dish and inspected under a  
93 Leica M165 FC stereomicroscope. Follicles were isolated from the surrounding stromal tissue via careful  
94 blunt dissection. A Cook Flexipet™ (Cook Medical) was used to pick up the follicles and transfer them  
95 into a 1.5mL Eppendorf tube with 250 uL of 10% FBS at 4°C.

96

97 For cryopreserved tissue digestion, the cortical tissue became less pliable and the follicles less  
98 prominent from the surrounding stromal tissue, so two modifications were made to aid with follicle  
99 identification. First, 150 uL of neutral red (NR, final concentration 50mcg/mL, Sigma-Aldrich) was added  
100 to the 50mL conical tube during tissue digestion [27]. Second, the McIlwain Tissue Chopper (Ted Pella)  
101 was used after digestion to further sharply dissect cortical pieces [25].

102

### 103 Histology and Immunohistochemistry

104 The effects of cryopreservation on ovarian cortical tissue was evaluated by both histology and  
105 immunohistochemistry. Tissue was evaluated at two stages: fresh and cryopreserved. Two cortical  
106 pieces per stage were submitted for evaluation. Preparation of slides occurred through the UT  
107 Southwestern Histo Pathology Core Laboratory. The cortical pieces were fixed in formalin solution and  
108 processed into 5µm slices. Images were procured at 20x magnification using a Zeiss Axioskop-2 Mot Plus  
109 microscope (Carl Zeiss, Germany) and a Leica DFC 450C camera using the Leica Application Suite v4.3.0  
110 (Leica Microsystems, Switzerland).

111  
112 Hematoxylin- and eosin-staining was used to evaluate follicle number and classification [28]. One  
113 reviewer procured images at 20x magnification. Ovarian follicles were counted and classified according  
114 to Gougeon [29] into one of three follicle stages: (i) primordial follicle; (ii) primary follicle; (iii) secondary  
115 follicle.

116  
117 Immunohistochemistry was used to evaluate both proliferative and apoptotic activity in the follicles. A  
118 separate single reviewer procured fluorescent images at 20x magnification. Fluorescein (FITC - green,  
119 Thermo Fisher) was used to stain the antigen of interest, and Cy3 (bright orange, Thermo Fisher) was  
120 used as the nuclear counterstain. Images were then analyzed using the ImageJ platform (v.2.0.0-rc-  
121 59/1.51n). The nuclear antigen Ki-67 was used to evaluate proliferative activity in the follicles [28]. Ki-67  
122 is associated with cellular proliferation, present only during the active phase of the cell cycle (late G1, S,  
123 G2, and M phase). A proliferation index was calculated, defined as the percentage of Ki-67 positive  
124 granulosa cells over total granulosa cells for each class of follicle. Follicular apoptotic activity was  
125 evaluated using a terminal deoxynucleotidyl transferase dUTP nick end labeling (TUNEL) assay, which  
126 detects DNA fragmentation [30]. DNA fragmentation occurs in the final phase of apoptosis. An apoptotic  
127 index was calculated, defined as the percentage of TUNEL positive granulosa cells over total granulosa  
128 cells for each class of follicle.

129  
130 Omni-ATAC Transposition

131 Analysis of gene regulation using a modified omni-ATAC approach [31] took place on isolated follicles  
132 from two time points: fresh tissue and cryopreserved and thawed tissue. Each follicle was estimated to  
133 have about 1000 cells, and reagent concentrations were adjusted accordingly, most importantly to keep  
134 the transposase:cell number ratio similar. Following the Corces protocol, a stock resuspension buffer

135 was made using 1M Tris-HCl pH 7.4 (final concentration 10mM), 5M NaCl (final conc. 10mM), 1M MgCl<sub>2</sub>  
136 (final conc. 3mM), and molecular water.

137  
138 After isolation, the follicle suspension was pelleted at 500 RCF for 5 minutes at 4°C. The supernatant was  
139 carefully removed so as to not disturb the pellet. The pellet was then resuspended in 50 uL PBS by finger  
140 tap. The suspension was then centrifuged again at 500 RCF for 5 minutes at 4°C. The supernatant was  
141 carefully removed. The lysis buffer was added (for most reactions; 48.5uL resuspension buffer, 0.5uL  
142 10% NP-40 [final 0.1% v/v], 0.5uL 10% Tween-20 [final 0.1% v/v], 0.5uL 1% digitonin [final 0.01% v/v]),  
143 and the pellet was resuspended by finger tap. The suspension was incubated on ice for 3 minutes. A  
144 wash buffer was then added (for most reactions; 990uL resuspension buffer, 10uL 10% Tween-20 [final  
145 0.1% v/v]), and the suspension was immediately centrifuged at 500 RCF for 10 minutes at 4°C. The  
146 supernatant was carefully removed. The transposition reaction was then added based on cell number  
147 (reaction included Illumina TDE1 Tagment DNA Enzyme, Illumina TD [Tagment DNA] Buffer, PBS, 10%  
148 Tween-20, 1% digitonin, molecular water). The pellet was suspended by finger tap, and the suspension  
149 was incubated on a thermomixer at 37°C with 1000 rpm of agitation for 30 minutes.

150  
151 To stop the transposition, the suspension was subjected to immediate purification using the QIAquick  
152 PCR purification kit (Qiagen) with MinElute columns (Qiagen) [32]. The purified DNA fragments were  
153 then resuspended in 15 uL molecular water (Sigma-Aldrich), run through the column twice to ensure  
154 complete yield. To assess yield prior to library preparation, the QuBit dsDNA HS Assay (Thermo Fisher)  
155 was used to analyze the DNA concentration in 1 uL of the resulting suspension.

#### 156 157 Library Preparation

158 The PCR amplification protocol was performed as previously reported with minor adaptations [32]. The  
159 purified DNA fragments underwent an initial PCR reaction of 5 cycles (25uL NEBNext® Ultra™ II Q5®  
160 Master Mix, 7uL sample, 8uL molecular water, 5uL Nextera/Illumina Index 1 [i7] adapter, 5uL  
161 Nextera/Illumina Index 2 [i5] adapter). The resulting product was diluted 1 uL in 1000 uL molecular  
162 water and underwent quantitative PCR with Power SYBR Green, following the KAPA protocol. 6uL  
163 master mix + primer solution was added to 4uL standard or dilute sample; samples were run in duplicate  
164 using a LightCycler® 480 Instrument II system (Roche). The quantitative 2<sup>nd</sup> derivative calculation was  
165 then entered into an Excel program, and the number of additional PCR cycles were calculated to achieve  
166 a final concentration of between 10-20 nM.

167

#### 168 Library Purification

169 After quantitative PCR, the libraries were purified using a double-sided bead purification protocol. The  
170 AMPure XP beads (Beckman Coulter) were warmed to room temperature and vortexed into suspension.  
171 The amplified library was transferred to a new 1.5mL Eppendorf tube, and 0.5x volume beads were  
172 added and mixed thoroughly with pipette action. The mixture was incubated at room temperature for  
173 10 minutes, and then placed on a magnetic rack for 5 minutes. The supernatant was removed and  
174 transferred to a new 1.5mL Eppendorf tube. 1.3x volume AMPure beads were then added and mixed  
175 thoroughly with pipette action. The mixture was incubated at room temperature for 10 minutes, and  
176 then placed on a magnetic rack for 5 minutes. The supernatant was carefully removed and discarded.  
177 The bead pellet was then washed with 200uL freshly made 80% EtOH: the volume was pipetted down  
178 the opposite side of the Eppendorf tube as the pellet, covered the pellet for 30 seconds, and was then  
179 removed. This process was repeated for a total of four washings. After the washings were completed,  
180 the Eppendorf tubes were left open for 10 minutes to allow evaporation of all the EtOH. The beads were  
181 then resuspended in 20uL molecular water. The Eppendorf tube was placed back on the magnetic rack  
182 for 3 minutes, and the supernatant containing the purified library was transferred to a new 1.5mL  
183 Eppendorf tube. The quality of the purified library was assessed using Bioanalyzer High Sensitivity  
184 Analysis on a 2200 TapeStation (Agilent).

185

#### 186 Sequencing

187 The purified library was quantified using a Qubit dsDNA HS Assay Kit (Thermo Fisher). Libraries with  
188 unique adapter barcodes were pooled, multiplexed, and sequenced on an Illumina NextSeq 500 (75 bp  
189 paired-end reads). Typical sequencing depth was at least 50 million reads per sample.

190

#### 191 Omni-ATAC Quality Control, Alignment, and Normalization

192 Quality of the ATAC-seq datasets was assessed using the FastQC tool. The ATAC-seq reads were then  
193 aligned to the human reference genome (hg19) using BWA (v.0.7.5). For unique alignments, duplicate  
194 reads were filtered out. The resulting uniquely mapped reads were normalized to the same read depth  
195 across all samples and converted into bigWig files using BEDTools [33] for visualization in Integrative  
196 Genomics Viewer [34]. The fragment length distribution plots were generated using  
197 CollectInsertSizeMetrics tool from Picard (v 2.10.3).

198

199 Denoising

200 AtacWorks(v 0.3.0) was used to denoise the ATAC-seq data. All the fresh and cryopreserved and thawed  
201 samples were first preprocessed using the pipeline available at  
202 [https://github.com/zchiang/atacworks\\_analysis/tree/master/preprocessing](https://github.com/zchiang/atacworks_analysis/tree/master/preprocessing). After preprocessing, the  
203 atac-seq data was denoised to improve the signal-to-noise ratio using the model available from  
204 [https://ngc.nvidia.com/catalog/models/nvidia:atac\\_bulk\\_lowqual\\_20m\\_20m](https://ngc.nvidia.com/catalog/models/nvidia:atac_bulk_lowqual_20m_20m). The denoised tracks as  
205 well as denoised peaks were obtained from atacworks. The denoised BigWig files were used to generate  
206 average ATAC-seq profiles using plotProfile tool from deepTools (v.3.4.3).

207

208 Peak Analysis

209 The denoised peaks across all samples in each group were merged to create a consensus peakset using  
210 HOMER mergePeaks (v.4.9) and venn diagrams were generated using custom R scripts. Peaks were  
211 annotated to nearest genes using HOMER annotatePeaks.pl (v.4.9) with default settings.

212

213 Classification of Regulatory Elements

214 *Cis*-Regulatory elements (cis-REs) like promoters, enhancers, and insulators were predicted using CoRE-  
215 ATAC.

216

217 Motif Enrichment Analysis

218 Motif matching and enrichment of the open chromatin regions was performed using the motif analysis  
219 tools from Regulatory Genomics Toolbox (RGT)(v0.12.3). Motif matching of the denoised and merged  
220 peaks of fresh and thawed samples.

221

222 **Data Availability.** Data files will be deposited in the Gene Expression Omnibus database under accession  
223 number GSExxx.



224 **Results**

225 **Histological assessment of follicles in fresh and cryopreserved ovarian cortical tissue**

226 Our goal was to observe the histologic effects on both fresh and cryopreserved preantral follicles as they  
227 were subjected to ovarian tissue cryopreservation. Cortical tissue was obtained, transported, and  
228 processed into cortical pieces (**Figure 1**). With regard to H&E evaluation, the follicles in fresh samples  
229 were more evenly dispersed between primordial, primary, and secondary (**Table 1**). In cryopreserved  
230 samples, the follicles had a distinct shift toward primordial classification (**Table 1**). Surprisingly,  
231 numerically more follicles were observed in the cryopreserved tissue. While large fluctuations in  
232 follicular density between patients has been observed [12], the difference observed here occurred  
233 within the primordial follicle population of samples provided by the same patient. The average age of  
234 the study participants was forty-one years old, but the samples that showed expansion of the primordial  
235 population were in those patients less than forty years old. Interestingly, an expansion in the primordial  
236 pool after cryopreservation has been previously reported [10].

237  
238 To determine the effects of cryopreservation on tissue integrity in our hands, we assessed both  
239 proliferation and apoptosis from fresh and cryopreserved tissue. No difference in proliferation was seen  
240 among fresh and cryopreserved ovarian follicles classified as either primordial or primary (**Figure 2A**).  
241 Secondary ovarian follicles did show a significant trend toward increased proliferation in the fresh state  
242 (**Figure 2A**). With regard to apoptosis, primordial and primary follicles demonstrated no difference in  
243 staining, however secondary follicles did show increased apoptosis after cryopreservation and thaw  
244 (**Figure 2B**). These data are consistent with prior evidence suggesting that primordial follicles more  
245 easily survive the cryopreservation process [35].

246  
247 The addition of neutral red allowed for easier visualization (**Figure 3A**) and for the distinction between  
248 viable and non-viable follicles (**Figure 3A** versus **3B**) [27]. The improved visualization also allowed for a  
249 significant increase in follicular yield (**Figure 3C**). Overall, our immunohistochemistry data demonstrate  
250 that we isolated viable tissue. Further, preantral follicles seemed relatively unaffected histologically by  
251 cryopreservation, suggesting that they might be a good target for the genomic analyses described  
252 below.

253

254

255

## 256 **ATAC Analysis From Fresh Ovarian Follicles**

257 Before we could determine the effects of cryopreservation on the chromatin state at regulatory  
258 elements, we first needed to define these regions from fresh cortical tissue. Preantral follicles were  
259 isolated and subjected to Omni-ATAC, an ATAC-seq protocol that allows chromatin accessibility profiling  
260 from frozen tissue samples [31]. The insert size distribution of sequenced fragments had clear  
261 nucleosomal periodicity of around 200 bp, as expected (**Figure 4A**). Importantly, data sets obtained from  
262 individual donor samples processed immediately after dissection were highly correlated (**Figure 4B**). We  
263 observed enrichment of open chromatin at known oocyte-specific and granulosa cell-specific markers,  
264 GDF-9 and FOXL-2, respectively, that appeared consistent between donors (**Figure 4C**), indicative of  
265 isolation of the cell types of interest. To improve the signal over background in our data sets, we used a  
266 deep learning toolkit called AtacWorks [36] to denoise our sequencing data (**Figure 4D**).

267  
268 We next determined regions of accessible chromatin from our fresh samples and used a deep learning  
269 framework called CoRE-ATAC to functionally assign the identified regulatory elements as promoters,  
270 enhancers, or insulators [37]. Using this method, 14% of the identified regulatory elements were  
271 annotated as promoters and 10% were annotated as enhancers (**Figure 4E**). We then used gene  
272 ontology to identify biological processes associated with the active promoters we identified from fresh  
273 follicles (**Figure 4F**). Overall these regulatory regions were associated with the translation and processing  
274 of RNA, as well as some DNA repair. These observations are in line with the reliance of the oocyte on  
275 translation as a mechanism of gene regulation rather than transcription [38]. To understand the  
276 regulatory networks active in preantral follicles, we used HINT-ATAC to identify the top 10 motifs  
277 enriched in the ATAC-seq data over background for both promoters and enhancers. At promoters, we  
278 identify motifs for transcription factors reported to play a role in germ cell biology, e.g., NRF1 and  
279 TFAP2A [39–41] (**Figure 4G**). We also observe a number of motifs for transcription factors associated  
280 with cell cycle regulation (e.g., E2F4, TFDP1, HINFP), thought to play an important role in establishing  
281 cell cycle post-fertilization and in early embryonic cells [42,43]. Interestingly, at enhancers, we identified  
282 motifs for a number of homeobox transcription factors (e.g., TLX1 and PKNOX1/2). While homeobox  
283 proteins such as the HOX genes are typically associated with developmental patterning, there are  
284 reports of oocyte-specific homeobox proteins [44], in support for a role for this class of proteins in the  
285 oocyte. We also identify the TWIST1 motif in preantral follicle enhancers, in line with the epithelial-to-  
286 mesenchymal (EMT) transition having a role during folliculogenesis [45]. In addition, we also observed  
287 motifs associated with early embryonic differentiation, such as NEUROD1 and TBX5 (**Figure 4H**). These

288 data suggest that the oocyte and supporting granulosa cells may carry a “poised” enhancer signature  
289 [46,47] to promote lineage-specifying transcription programs upon fertilization and subsequent  
290 differentiation.

291

## 292 **ATAC Analysis From Cryopreserved Ovarian Follicles**

293 Studies using cryopreserved tissue in autologous transplant demonstrate that these grafts experience  
294 follicular “burn-out” over time, in part attributed to ischemia and aberrant follicular activation post-  
295 transplant [16,48,49]. However, it remains formally possible that the act of cryopreservation itself may  
296 alter gene regulatory networks in follicles, leading to follicular exhaustion upon transplant. To determine  
297 the effect of cryopreservation on gene regulatory networks, we subjected preantral follicles from  
298 cryopreserved tissue to the same Omni-ATAC protocol described above. We obtained data from three  
299 patient samples, with two of these samples directly matched from our fresh data sets (from donors 1  
300 and 4). Overall, data sets from cryopreserved follicles were highly correlated among themselves and also  
301 with datasets obtained from freshly dissected follicles (**Figure 5A**). ATAC-seq data sets from  
302 cryopreserved tissue were slightly lower quality compared to data sets obtained from fresh tissue, a  
303 known issue when processing frozen samples and tissues specifically [31]. Processing with the  
304 AtacWorks algorithm [36] resulted in improved signal quality, similar to what we observed with  
305 processed data from fresh tissue (**Figure 5B**).

306

307 We next wanted to compare the open chromatin landscape between fresh and cryopreserved preantral  
308 follicles. First, we find that the majority of peaks identified from fresh follicles are still present in  
309 cryopreserved follicles (34,259/39,250 or 87%, **Figure 5C**), demonstrating that cell identity is maintained  
310 through cryopreservation. However, we observe a dramatic increase in the number of open chromatin  
311 regions present in follicles after cryopreservation (95,706 peaks from cryopreserved follicles vs. 44,081  
312 peaks from fresh follicles, **Figure 5C**). This increased accessibility was evident in direct comparison of  
313 specific loci from data sets obtained from donor-matched fresh and cryopreserved samples (**Figure 5D**).  
314 CoRE-ATAC was then used to functionally assign open chromatin regions identified only after  
315 cryopreservation (n=61,447). Surprisingly, whereas 10% are annotated as enhancers, only 1% of these  
316 regions are annotated as promoters (**Figure 5E**). This is in contrast to results from fresh follicles, where  
317 around 14% of the regulatory elements identified are annotated as promoters. This data suggests that,  
318 in general, while the open chromatin state at promoters is unaffected by cryopreservation, this process

319 results in dysregulation of chromatin states leading to increased DNA accessibility specifically at  
320 enhancers.

321

322 We then considered two possible mechanisms by which enhancers could be dysregulated by  
323 cryopreservation. First, this could represent a stochastic process, by which chromatin structure is  
324 damaged by the process of cryopreservation and the affected enhancer elements are random. Second,  
325 we imagined that the act of cryopreservation might affect specific pathways, which would be evidenced  
326 by the presence of unique motifs when considering enhancers identified only from the cryopreserved  
327 follicles. To determine whether unique transcription factor motifs were present in cryopreserved  
328 follicles, we considered the top 30 enriched motifs in either all fresh enhancers or only cryopreserved  
329 enhancers. We identified 19 motifs that were common to both sets of enhancers, and 11 motifs that  
330 were unique to each group. Of these, we present the top 10 motifs that were enriched in enhancers  
331 identified only in cryopreserved follicles (**Figure 5F**). Included are motifs associated with well-known  
332 ovarian signaling pathways, for example the SMAD family involved in TGF- $\beta$  signaling and the TCF family  
333 involved in Wnt signaling. Both the TGF- $\beta$  and Wnt signaling pathways are involved in follicular  
334 activation [50,51]. Further, we identified motifs that are targets of these signaling pathways that have  
335 known roles in EMT (e.g., ID4, SNAI2, ZEB1), which has been implicated in both normal physiologic and  
336 abnormal pathophysiologic processes in the female reproductive tract [45]. Finally, we performed  
337 ontology analysis of nearest neighboring genes to dysregulated enhancers using GREAT [52] (**Figure 5G**).  
338 These terms suggest that cryopreserved follicles are activating enhancers associated with TGF- $\beta$   
339 signaling (e.g., SMAD activity) and cellular differentiation. Overall, motif assessment and ontology  
340 analysis suggests that cryopreserved tissues may be responding to specific signaling pathways, and that  
341 the enhancer dysregulation observed may be specific.

342

### 343 **Discussion**

344 Overall, our work provides the first genomic analysis of active regulatory elements in matched fresh and  
345 cryopreserved ovarian preantral follicles as they undergo the process of ovarian tissue cryopreservation.  
346 We find that, while chromatin accessibility appears unperturbed at promoters, cryopreserved follicles  
347 show evidence of chromatin dysregulation of enhancer regions. Signaling pathways associated with  
348 follicular activation and the epithelial-mesenchymal transition (e.g. TGF- $\beta$  and Wnt signaling) appear to  
349 be activated in cryopreserved tissue, suggesting that the process of cryopreservation itself may  
350 contribute to graft burn-out and fibrosis post-transplantation.

351

352 Independent of our analysis of the effects of cryopreservation, our study is of note because it is the first  
353 to identify active regulatory elements from human follicles. Analysis of the top 10 enriched promoter  
354 motifs identified potential roles for a number of transcription factors that have previously been  
355 associated with oocyte function. For example, TFDP1, E2F4, and HINFP are all associated with cell cycle  
356 and have been reported to be maternally stored in the oocyte to facilitate rapid cell cycle activation  
357 upon fertilization [42,53]. NRF1 is associated with mitochondrial respiration and has also been  
358 implicated in oocyte activation post-fertilization [39]. Further, NRF1 may function to regulate genetic  
359 stability through regulation of the kinetochore and spindle assembly [54], dysfunction of which can  
360 occur in aged oocytes [55]. Interestingly, EGR1 has been reported as a marker of ovarian aging in mouse  
361 models [56], which may be reflective of the relatively advanced age of our donor group at an average of  
362 forty-one years old. When we consider transcription-factor binding motifs enriched at enhancers  
363 identified in follicles, we observe a number of homeobox proteins, including TLX1 and PKNOX1/2.  
364 Several of these factors have previously been observed in mouse follicles [44,57], although their  
365 function in oocyte maturation and granulosa cell differentiation remains poorly understood.  
366 Additionally, we observe motifs such as TBX5 and NEUROD1, transcription factors associated with  
367 differentiation. These data suggest that the oocyte may be primed for development, as has previously  
368 been observed in both mouse and human embryonic stem cells [46,47].

369

370 With regard to our cryopreserved data, we observed evidence of signaling through well-known ovarian  
371 signaling pathways, specifically the TGF- $\beta$ , Wnt, and Hippo signaling pathways. Interestingly, these  
372 pathways are not only involved in follicular activation [58–60] but also in the epithelial-mesenchymal  
373 transition. Perhaps it is not surprising that mechanisms of cellular plasticity appear to be activated in  
374 tissue undergoing extreme mechanical and metabolic stress as a result of dissection and  
375 cryopreservation. EMT encompasses three types of cellular transitions: type 1 EMT occur predominantly  
376 during embryo- and organo-genesis, type 2 occur during episodes of tissue healing and fibrosis, and type  
377 3 occur during carcinogenesis [61,62]. The transitory nature of EMT has led some to consider that the  
378 plasticity of this state may be due to epigenetic master regulators with widespread effects on gene  
379 expression [63]. Indeed, two of these master regulators were identified upon analysis of the top  
380 enhancer motifs: ZEB1 and SNAI2 (SLUG) [62]. These regulators are acted upon by a variety of signaling  
381 cascades, including TGF- $\beta$  and Wnt.

382

383 In relation to EMT, TGF- $\beta$  signaling causes repression of the epithelial E-cadherin in favor of the  
384 expression of the mesenchymal N-cadherin [62,64], a major step in the initiation of the epithelial-  
385 mesenchymal transition. There is evidence that Wnt signaling can play a role in regulating EMT, as beta-  
386 catenin has been shown to directly bind to the promoters of ZEB1 and SNAI2 (SLUG) to induce their  
387 expression [65]. Interestingly, we observe increased regulatory element engagement on TEAD1, a critical  
388 transcription factor in the Hippo signaling pathway. Hippo inhibition has been shown to reduce TGF- $\beta$   
389 signaling activity [66], suggesting that Hippo pathway may be upstream of TGF- $\beta$  signaling during  
390 response to cryopreservation. High levels of TGF- $\beta$  have been associated with fibrosis in the ovary [45],  
391 and graft fibrosis is one of the reasons ovarian tissue cryopreservation and auto-transplantation is not a  
392 preferred method for older women [67]. Indeed, when we attempted to xenotransplant human ovarian  
393 tissue sections into immunocompromised mouse models, we observed long-term fibrosis four weeks  
394 after transplant (data not shown). Overall, these observations suggest a complicated molecular cascade  
395 in which follicles may be responding to the mechanical and metabolic stress of cryopreservation through  
396 dysregulation of TGF- $\beta$  and Wnt signaling.

397  
398 Our data has a few limitations that merit consideration. First, due to the limited amount of tissue  
399 available for follicle isolation, follicles were obtained as a collective group, rather than in stage-specific  
400 groups. Although most follicles isolated were anticipated to be from a primary to early secondary stage  
401 due to follicle size and cortical location, cryopreserved samples yielded the occasional primordial nest.  
402 Thus, it is formally possible that the expansion of enhancer signals observed from cryopreserved tissue  
403 could be caused by the isolation of proportionally more primordial follicles in the cryopreserved cortex  
404 as compared to the fresh cortex. Second, again due to collection limitations, our tissue was collected  
405 from donors of more advanced age compared with many previous studies. On a broad scale, given the  
406 trauma to the tissue, it is generally plausible that the epithelial-mesenchymal transition is initiated.  
407 However, given that many fertility-related outcomes depend on the age of the woman, one would  
408 suspect that the balance of the signals in EMT networks would also be affected by age. Perhaps younger  
409 tissue is able to survive EMT activation with less fibrosis, leading to improved graft viability. The  
410 question then becomes, Is there a way to pharmacologically tip the balance away from EMT and fibrosis  
411 by suppressing TGF- $\beta$ ? This strategy has been looked at with favorable results in prior mammalian  
412 studies involving end stage renal disease, renal allotransplant, peritoneal fibrosis, and pulmonary  
413 fibrosis [68–71]. Third, our cryopreservation protocol used vitrification. There have been conflicting  
414 studies regarding vitrification of ovarian tissue, with most of the live births originating from slow-freeze

415 tissue [4,10,72–74]. Whether early differences between slow freezing and vitrification protocols affect  
416 final graft outcome is still a question under active investigation, and the use of vitrification for our  
417 protocol may not apply to tissue that has undergone slow freeze protocols.

418

419 Overall, our research provides a first glimpse into the chromatin accessibility profile of gene regulatory  
420 elements in ovarian follicles as they undergo the process of ovarian tissue cryopreservation. While  
421 promoter regions were mostly maintained through cryopreservation, enhancer regions were  
422 dysregulated in a way that suggested activation of folliculogenesis and the epithelial-mesenchymal  
423 transition. With regard to OTC, this new knowledge gives another avenue for development of  
424 interventions that could flip the transition away from follicular activation and fibrosis to preserve tissue  
425 integrity and function.

426 **Acknowledgements**

427 The authors thank Dr. Kaitlin Doody for her work to microscopically record the H&E ovarian cortical  
428 tissue images.

429

430 **Conflict of Interest**

431 None to disclose.

432

433 **Author Contributions**

434 J.S. conceived the project and performed the experiments. A.S. analyzed the ATAC-seq data. Z.J.  
435 provided invaluable experience in the cryopreservation and thaw of ovarian cortical tissue. S.C. provided  
436 microscopic recording as well as analysis of immunohistochemically-stained ovarian cortical tissue. O.B.,  
437 B.C., and L.B. conceived the project and provided funding for the work. J.S. and L.B. wrote the  
438 manuscript with input from all authors.



## 439 References

- 440 [1] Rosendahl M, Schmidt KT, Ernst E, Rasmussen PE, Loft A, Byskov AG, Andersen AN, Andersen CY.  
441 Cryopreservation of ovarian tissue for a decade in Denmark: a view of the technique. *Reprod*  
442 *Biomed Online* 2011; 22:162–171.
- 443 [2] Suzuki N, Yoshioka N, Takae S, Sugishita Y, Tamura M, Hashimoto S, Morimoto Y, Kawamura K.  
444 Successful fertility preservation following ovarian tissue vitrification in patients with primary  
445 ovarian insufficiency. *Hum Reprod* 2015; 30:608–615.
- 446 [3] Van der Ven H, Liebenthron J, Beckmann M, Toth B, Korell M, Krüssel J, Frambach T, Kupka M,  
447 Hohl MK, Winkler-Crepaz K, Others. Ninety-five orthotopic transplantations in 74 women of ovarian  
448 tissue after cytotoxic treatment in a fertility preservation network: tissue activity, pregnancy and  
449 delivery rates. *Hum Reprod* 2016; 31:2031–2041.
- 450 [4] Silber SJ, DeRosa M, Goldsmith S, Fan Y, Castleman L, Melnick J. Cryopreservation and  
451 transplantation of ovarian tissue: results from one center in the USA. *J Assist Reprod Genet* 2018;  
452 35:2205–2213.
- 453 [5] Shapira M, Dolmans M-M, Silber S, Meirou D. Evaluation of ovarian tissue transplantation:  
454 results from three clinical centers. *Fertil Steril* 2020; 114:388–397.
- 455 [6] Dolmans M-M, Falcone T, Patrizio P. Importance of patient selection to analyze in vitro  
456 fertilization outcome with transplanted cryopreserved ovarian tissue. *Fertil Steril* 2020; 114:279–  
457 280.
- 458 [7] Demeestere I, Simon P, Dedeken L, Moffa F, Tsépélidis S, Brachet C, Delbaere A, Devreker F,  
459 Ferster A. Live birth after autograft of ovarian tissue cryopreserved during childhood. *Hum Reprod*  
460 2015; 30:2107–2109.
- 461 [8] Andersen CY, Silber SJ, Berghold SH, Jorgensen JS, Ernst E. Long-term duration of function of  
462 ovarian tissue transplants: case reports. *Reproductive BioMedicine Online* 2012; 25:128–132.
- 463 [9] Kim SS. Assessment of long term endocrine function after transplantation of frozen-thawed  
464 human ovarian tissue to the heterotopic site: 10 year longitudinal follow-up study. *J Assist Reprod*  
465 *Genet* 2012; 29:489–493.
- 466 [10] Abir R, Fisch B, Fisher N, Samara N, Lerer-Serfaty G, Magen R, Herman-Edelstein M, Ben-  
467 Haroush A, Stein A, Orvieto R. Attempts to improve human ovarian transplantation outcomes of  
468 needle-immersed vitrification and slow-freezing by host and graft treatments. *J Assist Reprod*  
469 *Genet* 2017; 34:633–644.
- 470 [11] Ladanyi C, Mor A, Christianson MS, Dhillon N, Segars JH. Recent advances in the field of  
471 ovarian tissue cryopreservation and opportunities for research. *J Assist Reprod Genet* 2017;  
472 34:709–722.
- 473 [12] Yding Andersen C, Mamsen LS, Kristensen SG. FERTILITY PRESERVATION: Freezing of  
474 ovarian tissue and clinical opportunities. *Reproduction* 2019; 158:F27–F34.
- 475 [13] Herraiz S, Monzó S, Gómez-Giménez B, Pellicer A, Díaz-García C. Optimizing ovarian  
476 tissue quality before cryopreservation: comparing outcomes of three decortication methods on  
477 stromal and follicular viability. *Fertil Steril* 2020; 113:609–617.e3.
- 478 [14] Kim SS, Soules MR, Battaglia DE. Follicular development, ovulation, and corpus luteum  
479 formation in cryopreserved human ovarian tissue after xenotransplantation. *Fertil Steril* 2002;  
480 78:77–82.
- 481 [15] Gook DA, Edgar DH, Borg J, Archer J, McBain JC. Diagnostic assessment of the  
482 developmental potential of human cryopreserved ovarian tissue from multiple patients using  
483 xenografting. *Hum Reprod* 2005; 20:72–78.
- 484 [16] Gavish Z, Spector I, Peer G, Schlatt S, Wistuba J, Roness H, Meirou D. Follicle activation  
485 is a significant and immediate cause of follicle loss after ovarian tissue transplantation. *J Assist*

- 486       Reprod Genet 2018; 35:61–69.
- 487       [17]       Dolmans M-M, Donnez J, Cacciottola L. Fertility Preservation: The Challenge of Freezing  
488       and Transplanting Ovarian Tissue. Trends Mol Med 2020.
- 489       [18]       Amorim CA, David A, Dolmans M-M, Camboni A, Donnez J, Van Langendonck A. Impact  
490       of freezing and thawing of human ovarian tissue on follicular growth after long-term  
491       xenotransplantation. J Assist Reprod Genet 2011; 28:1157–1165.
- 492       [19]       Meirow D, Roness H, Kristensen SG, Andersen CY. Optimizing outcomes from ovarian  
493       tissue cryopreservation and transplantation; activation versus preservation. Hum Reprod 2015;  
494       30:2453–2456.
- 495       [20]       Ayuandari S, Winkler-Crepaz K, Paulitsch M, Wagner C, Zavadil C, Manzl C, Ziehr SC,  
496       Wildt L, Hofer-Tollinger S. Follicular growth after xenotransplantation of cryopreserved/thawed  
497       human ovarian tissue in SCID mice: dynamics and molecular aspects. J Assist Reprod Genet 2016;  
498       33:1585–1593.
- 499       [21]       Silber S. Ovarian tissue cryopreservation and transplantation: scientific implications.  
500       Journal of Assisted Reproduction and Genetics 2016; 33:1595–1603.
- 501       [22]       Friedman O, Orvieto R, Fisch B, Felz C, Freud E, Ben-Haroush A, Abir R. Possible  
502       improvements in human ovarian grafting by various host and graft treatments. Hum Reprod 2012;  
503       27:474–482.
- 504       [23]       Tanaka A, Nakamura H, Tabata Y, Fujimori Y, Kumasawa K, Kimura T. Effect of sustained  
505       release of basic fibroblast growth factor using biodegradable gelatin hydrogels on frozen-thawed  
506       human ovarian tissue in a xenograft model: Sustained release of bFGF on ovarian graft. J Obstet  
507       Gynaecol Res 2018; 44:1947–1955.
- 508       [24]       Silber S. Chapter 13 Human Ovarian Tissue Vitrification. Methods Mol Biol 2017;  
509       1568:177–194.
- 510       [25]       Dolmans M-M, Michaux N, Camboni A, Martinez-Madrid B, Van Langendonck A,  
511       Nottola SA, Donnez J. Evaluation of Liberase, a purified enzyme blend, for the isolation of human  
512       primordial and primary ovarian follicles. Hum Reprod 2006; 21:413–420.
- 513       [26]       Vanacker J, Camboni A, Dath C, Van Langendonck A, Dolmans M-M, Donnez J, Amorim  
514       CA. Enzymatic isolation of human primordial and primary ovarian follicles with Liberase DH:  
515       protocol for application in a clinical setting. Fertil Steril 2011; 96:379–383.e3.
- 516       [27]       Kristensen SG, Rasmussen A, Byskov AG, Andersen CY. Isolation of pre-antral follicles  
517       from human ovarian medulla tissue. Hum Reprod 2011; 26:157–166.
- 518       [28]       Dath C, Van Eyck AS, Dolmans MM, Romeu L, Delle Vigne L, Donnez J, Van Langendonck  
519       A. Xenotransplantation of human ovarian tissue to nude mice: comparison between four grafting  
520       sites. Hum Reprod 2010; 25:1734–1743.
- 521       [29]       Gougeon A. Dynamics of follicular growth in the human: a model from preliminary  
522       results. Hum Reprod 1986; 1:81–87.
- 523       [30]       Chambers EL, Gosden RG, Yap C, Picton HM. In situ identification of follicles in ovarian  
524       cortex as a tool for quantifying follicle density, viability and developmental potential in strategies to  
525       preserve female fertility. Hum Reprod 2010; 25:2559–2568.
- 526       [31]       Corces MR, Trevino AE, Hamilton EG, Greenside PG, Sinnott-Armstrong NA, Vesuna S,  
527       Satpathy AT, Rubin AJ, Montine KS, Wu B, Kathiria A, Cho SW, et al. An improved ATAC-seq protocol  
528       reduces background and enables interrogation of frozen tissues. Nat Methods 2017; 14:959–962.
- 529       [32]       Buenrostro JD, Wu B, Chang HY, Greenleaf WJ. ATAC-seq: A method for assaying  
530       chromatin accessibility genome-wide. Curr Protoc Mol Biol 2015; 109:21.29.1–21.29.9.
- 531       [33]       Quinlan AR, Hall IM. BEDTools: a flexible suite of utilities for comparing genomic  
532       features. Bioinformatics 2010; 26:841–842.
- 533       [34]       Robinson JT, Thorvaldsdóttir H, Winckler W, Guttman M, Lander ES, Getz G, Mesirov JP.

- 534 Integrative genomics viewer. *Nat Biotechnol* 2011; 29:24–26.
- 535 [35] Roness H, Meirou D. FERTILITY PRESERVATION: Follicle reserve loss in ovarian tissue  
536 transplantation. *Reproduction* 2019; 158:F35–F44.
- 537 [36] Lal A, Chiang ZD, Yakovenko N, Duarte FM, Israeli J, Buenrostro JD. Deep learning-based  
538 enhancement of epigenomics data with AtacWorks. *Nat Commun* 2021; 12:1507.
- 539 [37] Thibodeau A, Khetan S, Eroglu A, Tewhey R, Stitzel ML, Ucar D. CoRE-ATAC: A Deep  
540 Learning model for the functional Classification of Regulatory Elements from single cell and bulk  
541 ATAC-seq data. *bioRxiv* 2020:2020.06.22.165183.
- 542 [38] Richter JD, Lasko P. Translational control in oocyte development. *Cold Spring Harb  
543 Perspect Biol* 2011; 3:a002758.
- 544 [39] May-Panloup P, Vignon X, Chrétien M-F, Heyman Y, Tamassia M, Malthiery Y, Reynier P.  
545 Increase of mitochondrial DNA content and transcripts in early bovine embryogenesis associated  
546 with upregulation of mtTFA and NRF1 transcription factors. *Reprod Biol Endocrinol* 2005; 3:65.
- 547 [40] Kim HM, Han JW, Chan JY. Nuclear Factor Erythroid-2 Like 1 (NFE2L1): Structure,  
548 function and regulation. *Gene* 2016; 584:17–25.
- 549 [41] Chen D, Sun N, Hou L, Kim R, Faith J, Aslanyan M, Tao Y, Zheng Y, Fu J, Liu W, Kellis M,  
550 Clark A. Human Primordial Germ Cells Are Specified from Lineage-Primed Progenitors. *Cell Reports*  
551 2019; 29:4568–4582.e5.
- 552 [42] Ghule PN, Xie R-L, Colby JL, Rivera-Pérez JA, Jones SN, Lian JB, Stein JL, van Wijnen AJ,  
553 Stein GS. Maternal expression and early induction of histone gene transcription factor Hinfp  
554 sustains development in pre-implantation embryos. *Dev Biol* 2016; 419:311–320.
- 555 [43] Hsu J, Arand J, Chaikovskiy A, Mooney NA, Demeter J, Brison CM, Oliverio R, Vogel H,  
556 Rubin SM, Jackson PK, Sage J. E2F4 regulates transcriptional activation in mouse embryonic stem  
557 cells independently of the RB family. *Nat Commun* 2019; 10:2939.
- 558 [44] Rajkovic A, Pangas SA, Ballow D, Suzumori N, Matzuk MM. NOBOX deficiency disrupts  
559 early folliculogenesis and oocyte-specific gene expression. *Science* 2004; 305:1157–1159.
- 560 [45] Bilyk O, Coatham M, Jewer M, Postovit L-M. Epithelial-to-Mesenchymal Transition in the  
561 Female Reproductive Tract: From Normal Functioning to Disease Pathology. *Front Oncol* 2017;  
562 7:145.
- 563 [46] Rada-Iglesias A, Bajpai R, Swigut T, Brugmann SA, Flynn RA, Wysocka J. A unique  
564 chromatin signature uncovers early developmental enhancers in humans. *Nature* 2011; 470:279–  
565 283.
- 566 [47] Creighton MP, Cheng AW, Welstead GG, Kooistra T, Carey BW, Steine EJ, Hanna J,  
567 Lodato MA, Frampton GM, Sharp PA, Boyer LA, Young RA, et al. Histone H3K27ac separates active  
568 from poised enhancers and predicts developmental state. *Proc Natl Acad Sci U S A* 2010;  
569 107:21931–21936.
- 570 [48] Masciangelo R, Hossay C, Chiti MC, Manavella DD, Amorim CA, Donnez J, Dolmans M-M.  
571 Role of the PI3K and Hippo pathways in follicle activation after grafting of human ovarian tissue. *J  
572 Assist Reprod Genet* 2020; 37:101–108.
- 573 [49] Dolmans M-M, Martinez-Madrid B, Gadisseux E, Guiot Y, Yuan WY, Torre A, Camboni A,  
574 Van Langendonck A, Donnez J. Short-term transplantation of isolated human ovarian follicles and  
575 cortical tissue into nude mice. *Reproduction* 2007; 134:253–262.
- 576 [50] Knight PG, Glister C. TGF-beta superfamily members and ovarian follicle development.  
577 *Reproduction* 2006; 132:191–206.
- 578 [51] Hernandez Gifford JA. The role of WNT signaling in adult ovarian folliculogenesis.  
579 *Reproduction* 2015; 150:R137–48.
- 580 [52] McLean CY, Bristor D, Hiller M, Clarke SL, Schaar BT, Lowe CB, Wenger AM, Bejerano G.  
581 GREAT improves functional interpretation of cis-regulatory regions. *Nat Biotechnol* 2010; 28:495–

- 582 501.
- 583 [53] Wissing ML, Kristensen SG, Andersen CY, Mikkelsen AL, Høst T, Borup R, Grøndahl ML.
- 584 Identification of new ovulation-related genes in humans by comparing the transcriptome of
- 585 granulosa cells before and after ovulation triggering in the same controlled ovarian stimulation
- 586 cycle. *Human Reproduction* 2014; 29:997–1010.
- 587 [54] Oh DH, Rigas D, Cho A, Chan JY. Deficiency in the nuclear-related factor erythroid 2
- 588 transcription factor (Nrf1) leads to genetic instability. *FEBS Journal* 2012; 279:4121–4130.
- 589 [55] Ma J-Y, Li S, Chen L-N, Schatten H, Ou X-H, Sun Q-Y. Why is oocyte aneuploidy increased
- 590 with maternal aging? *J Genet Genomics* 2020; 47:659–671.
- 591 [56] Yuan S, Wen J, Cheng J, Shen W, Zhou S, Yan W, Shen L, Luo A, Wang S. Age-associated
- 592 up-regulation of EGR1 promotes granulosa cell apoptosis during follicle atresia in mice through the
- 593 NF- $\kappa$ B pathway. *Cell Cycle* 2016; 15:2895–2905.
- 594 [57] Villaescusa JC, Verrotti AC, Ferretti E, Farookhi R, Blasi F. Expression of Hox cofactor
- 595 genes during mouse ovarian follicular development and oocyte maturation. *Gene* 2004; 330:1–7.
- 596 [58] Hsueh AJW, Kawamura K, Cheng Y, Fauser BCJM. Intraovarian control of early
- 597 folliculogenesis. *Endocr Rev* 2015; 36:1–24.
- 598 [59] Grosbois J, Demeestere I. Dynamics of PI3K and Hippo signaling pathways during in vitro
- 599 human follicle activation. *Hum Reprod* 2018; 33:1705–1714.
- 600 [60] Shah JS, Sabouni R, Cayton Vaught KC, Owen CM, Albertini DF, Segars JH. Biomechanics
- 601 and mechanical signaling in the ovary: a systematic review. *J Assist Reprod Genet* 2018; 35:1135–
- 602 1148.
- 603 [61] Kalluri R, Weinberg RA. The basics of epithelial-mesenchymal transition. *Journal of*
- 604 *Clinical Investigation* 2009; 119:1420–1428.
- 605 [62] Dongre A, Weinberg RA. New insights into the mechanisms of epithelial–mesenchymal
- 606 transition and implications for cancer. *Nat Rev Mol Cell Biol* 2018; 20:69–84.
- 607 [63] Tam WL, Weinberg RA. The epigenetics of epithelial-mesenchymal plasticity in cancer.
- 608 *Nat Med* 2013; 19:1438–1449.
- 609 [64] Xu J, Lamouille S, Derynck R. TGF- $\beta$ -induced epithelial to mesenchymal transition. *Cell*
- 610 *Research* 2009; 19:156–172.
- 611 [65] Sánchez-Tilló E, Lázaro A, Torrent R, Cuatrecasas M, Vaquero EC, Castells A, Engel P,
- 612 Postigo A. ZEB1 represses E-cadherin and induces an EMT by recruiting the SWI/SNF chromatin-
- 613 remodeling protein BRG1. *Oncogene* 2010; 29:3490–3500.
- 614 [66] Szeto SG, Narimatsu M, Lu M, He X, Sidiqi AM, Tolosa MF, Chan L, De Freitas K, Bialik JF,
- 615 Majumder S, Boo S, Hinz B, et al. YAP/TAZ Are Mechanoregulators of TGF- $\beta$ -Smad Signaling and
- 616 Renal Fibrogenesis. *J Am Soc Nephrol* 2016; 27:3117–3128.
- 617 [67] Preservation TEGG on FF, The ESHRE Guideline Group on Female Fertility Preservation,
- 618 Anderson RA, Amant F, Braat D, D’Angelo A, de Sousa Lopes SMC, Demeestere I, Dwek S, Frith L,
- 619 Lambertini M, Maslin C, et al. ESHRE guideline: female fertility preservation†. *Human Reproduction*
- 620 *Open* 2020; 2020.
- 621 [68] Zhou J, Cheng H, Wang Z, Chen H, Suo C, Zhang H, Zhang J, Yang Y, Geng L, Gu M, Tan R.
- 622 Bortezomib attenuates renal interstitial fibrosis in kidney transplantation via regulating the EMT
- 623 induced by TNF- $\alpha$ -Smurf1-Akt-mTOR-P70S6K pathway. *J Cell Mol Med* 2019; 23:5390–5402.
- 624 [69] Qian W, Cai X, Qian Q, Zhang W, Wang D. Astragaloside IV modulates TGF - $\beta$ 1-
- 625 dependent epithelial-mesenchymal transition in bleomycin-induced pulmonary fibrosis. *Journal of*
- 626 *Cellular and Molecular Medicine* 2018; 22:4354–4365.
- 627 [70] Cao G, Li S, Shi H, Yin P, Chen J, Li H, Zhong Y, Diao L-T, Du B. Schisandrin B attenuates
- 628 renal fibrosis via miR-30e-mediated inhibition of EMT. *Toxicol Appl Pharmacol* 2019; 385:114769.
- 629 [71] Zhang Y, Huang Q, Chen Y, Peng X, Wang Y, Li S, Wu J, Luo C, Gong W, Yin B, Xiao J, Zhou

630 W, et al. Parthenolide, an NF- $\kappa$ B inhibitor, alleviates peritoneal fibrosis by suppressing the TGF-  
631  $\beta$ /Smad pathway. *International Immunopharmacology* 2020; 78:106064.  
632 [72] Shi Q, Xie Y, Wang Y, Li S. Vitrification versus slow freezing for human ovarian tissue  
633 cryopreservation: a systematic review and meta-analysis. *Sci Rep* 2017; 7:8538.  
634 [73] Herraiz S, Novella-Maestre E, Rodríguez B, Díaz C, Sánchez-Serrano M, Mirabet V,  
635 Pellicer A. Improving ovarian tissue cryopreservation for oncologic patients: slow freezing versus  
636 vitrification, effect of different procedures and devices. *Fertil Steril* 2014; 101:775–784.  
637 [74] Keros V, Xella S, Hultenby K, Pettersson K, Sheikhi M, Volpe A, Hreinsson J, Hovatta O.  
638 Vitrification versus controlled-rate freezing in cryopreservation of human ovarian tissue. *Hum*  
639 *Reprod* 2009; 24:1670–1683.

640

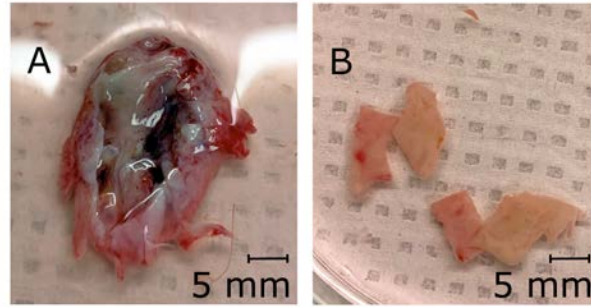

641

642 **Figure 1.** Fresh ovary processing. A) Tissue was obtained as ~8 mm diameter ovarian slices. B) Ovarian

643 cortical pieces, measuring 5-10 x 10 x 1 mm in dimensions, were created.

644

645

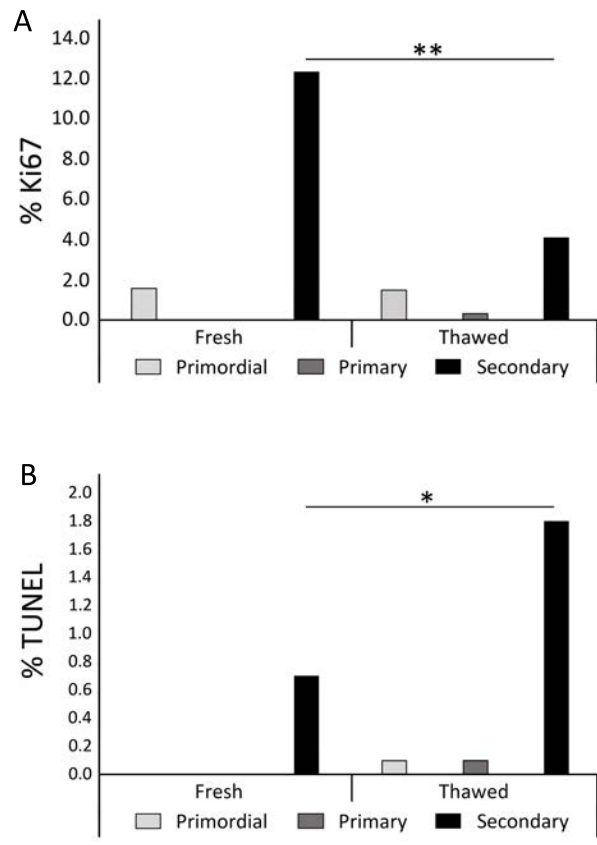

646  
647 **Figure 2.** Evaluation of proliferative and apoptotic markers before and after cryopreservation. A) Percent  
648 of Ki67-positive granulosa cells out of total granulosa cells. B) Percent of TUNEL-positive granulosa cells  
649 out of total granulosa cells. Significant differences were seen between secondary follicles in the fresh  
650 and cryopreserved states (\*p < 0.05, \*\* p < 0.001).  
651  
652

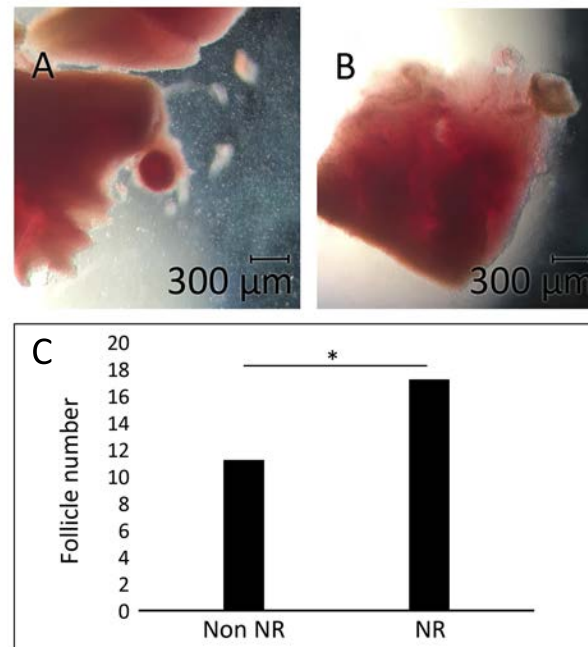

653

654 **Figure 3.** Neutral red versus non-neutral red follicle isolation. A) Neutral red-stained secondary follicle.

655 B) Non-staining secondary follicle after incubation. C) Average follicle count per isolation ( $p < 0.05$ ).

656

657



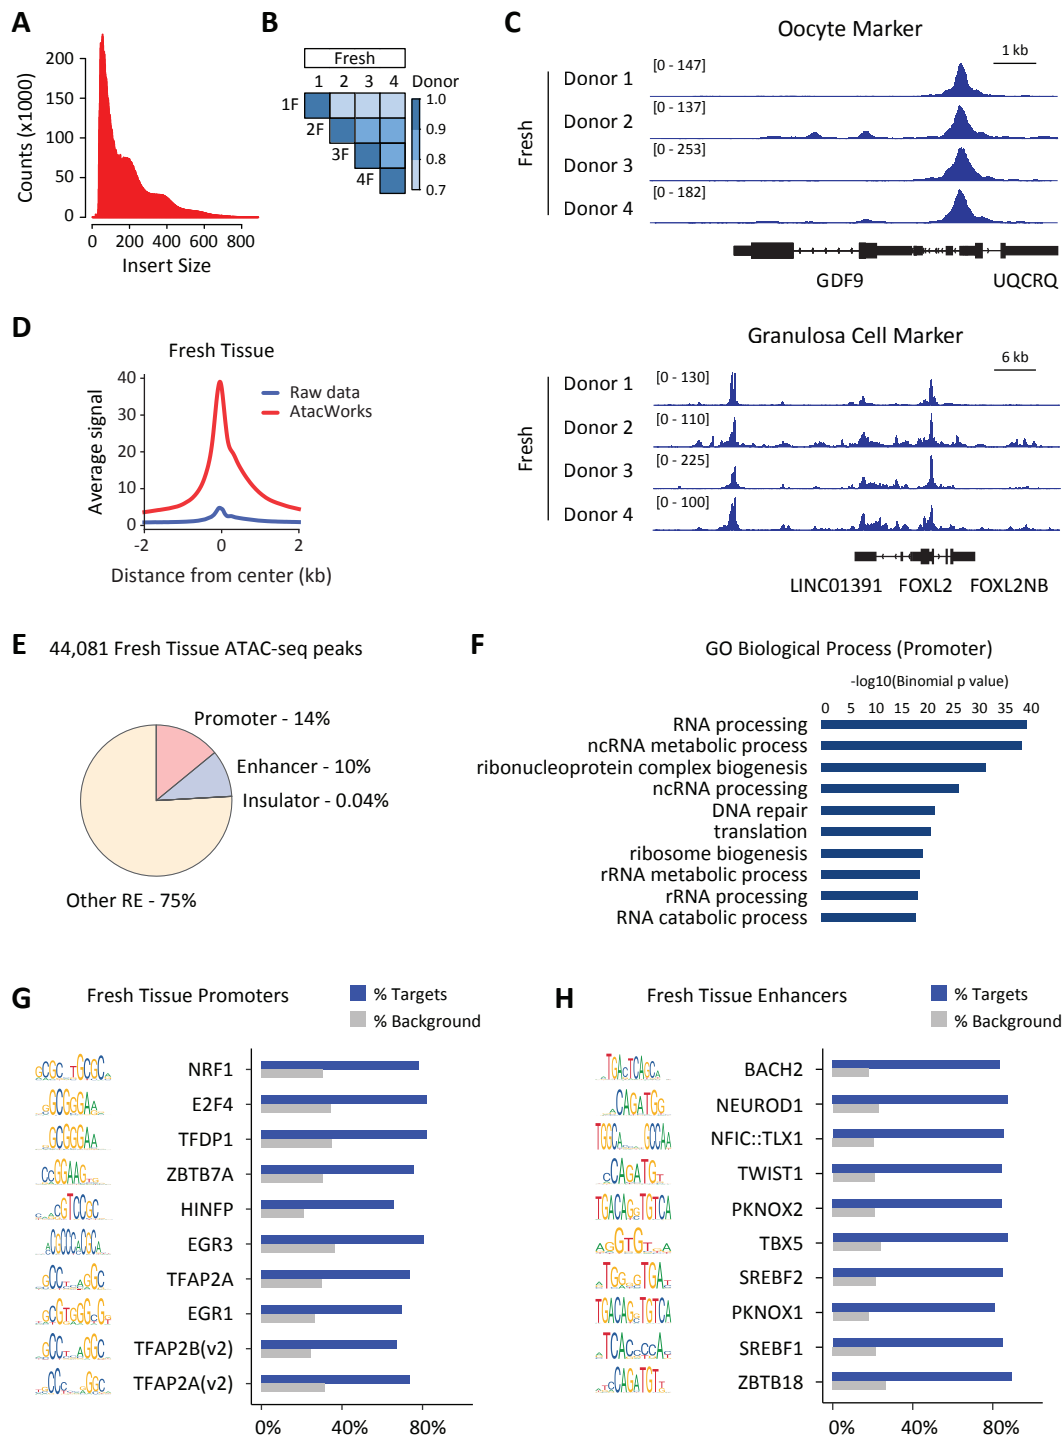

658  
 659 **Figure 4.** Identification of active regulatory elements in human follicles. A) ATAC-seq fragment sizes  
 660 generated from human follicles. B) Correlation between ATAC-seq datasets generated from human  
 661 follicles from multiple donors. C) Genome browser representations of ATAC-seq data from human

662 follicles. Representative oocyte marker (top panel, GDF9) and granulosa cell marker (bottom panel,  
663 FOXL2) are displayed. The y axis represents read density in reads per kilobase per million mapped  
664 (RPKM) reads. D) ATAC-seq average profiles from human follicles representing enriched regions before  
665 (Raw data) and after (AtacWorks) denoising using AtacWorks. E) Functional annotation of ATAC-seq  
666 peaks as promoter, enhancer, insulator, or other regulatory element (RE) using CoRE-ATAC. F) Gene  
667 ontology analysis of biological processes associated with active promoters identified from follicle ATAC-  
668 seq data. G and H) Motif enrichment for (G) follicle promoters and (H) follicle enhancers identified from  
669 ATAC-seq data. Top 10 motifs based on enrichment over background are displayed.

670

671

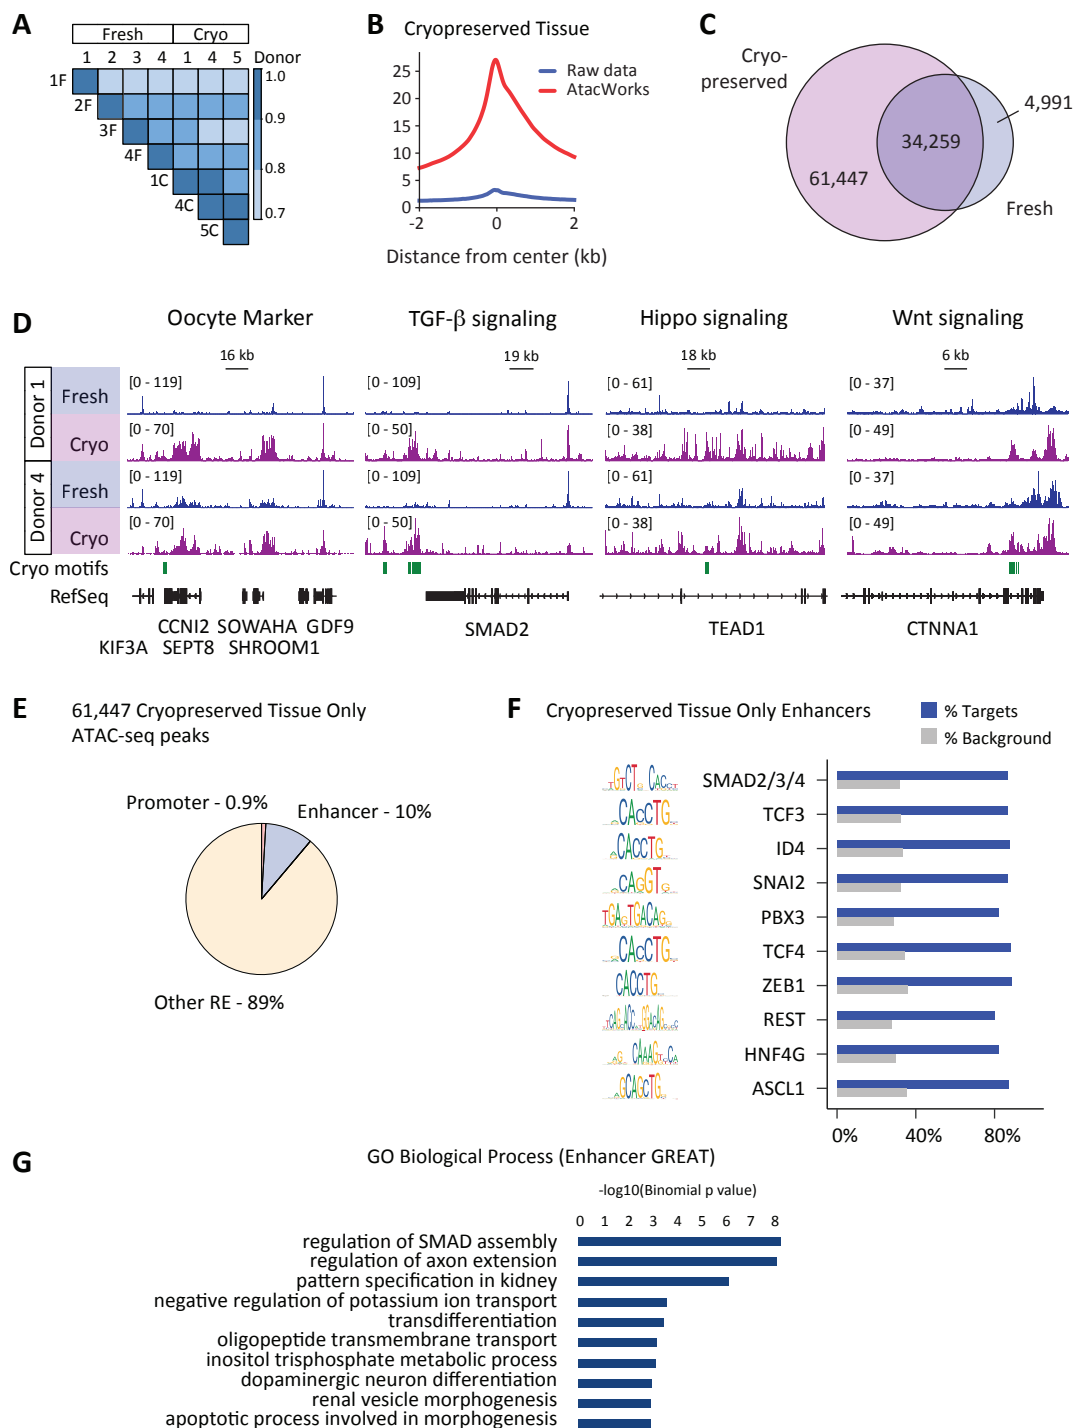

672  
 673 **Figure 5.** Comparison of active regulatory elements in follicles before and after cryopreservation. A)   
 674 Correlation between ATAC-seq datasets generated from human follicles from multiple donors before   
 675 (Fresh) or after (Cryo) cryopreservation. B) ATAC-seq average profiles from human follicles subjected to

676 cryopreservation representing enriched regions before (Raw data) and after (AtacWorks) denoising  
677 using AtacWorks. C) Venn diagram representing overlap between ATAC-seq enriched regions identified  
678 from fresh and cryopreserved human follicles. D) Genome browser representations of ATAC-seq data  
679 from human follicles before and after cryopreservation. The y axis represents read density in reads per  
680 kilobase per million mapped (RPKM) reads. E) Functional annotation of ATAC-seq peaks identified only  
681 from cryopreserved follicles using CoRE-ATAC. F) Motif enrichment for follicle enhancers identified only  
682 after cryopreservation. Top 10 unique motifs present only after cryopreservation from the top 30 motifs  
683 identified from cryopreserved follicle enhancers. G) Ontology analysis of associated biological processes  
684 for putative target genes (using GREAT) of enhancers identified from follicles only after  
685 cryopreservation.  
686

| <b>Table 1: Gougeon Classification of H&amp;E-stained Fresh and Thawed Ovarian Cortical Tissue</b> |                     |                     |                                                   |                |                  |
|----------------------------------------------------------------------------------------------------|---------------------|---------------------|---------------------------------------------------|----------------|------------------|
| <b>Tissue Type</b>                                                                                 | <b>Specimens, n</b> | <b>Follicles, n</b> | <b>Proportion of follicles n (% total number)</b> |                |                  |
|                                                                                                    |                     |                     | <b>Primordial</b>                                 | <b>Primary</b> | <b>Secondary</b> |
| Fresh                                                                                              | 6                   | 19                  | 6 (31.6%)                                         | 4 (21%)        | 9 (47.4%)        |
| Thawed                                                                                             | 5                   | 94                  | 68 (72.3%)                                        | 10 (10.6%)     | 16 (17%)         |

687
